# Supplementary material
Source: PubMed Central journal article supplement (PMC5860557)
Supplement: kwx206mullolywebmaterialfinalrevised.pdf [file kwx206mullolywebmaterialfinalrevised.pdf]

Web Table 1. Characteristics of postmenopausal women (n=190,325) in the NIH-AARP Diet and Health Study Cohort, (1995-2011).

| Characteristics                        | Person-Years | DCIS (n=1,453) |      | LCIS (n=186) |      | IDC (n=7,525) |      | ILC (n=1,191) |      | Total (N=190,325) |      |
|----------------------------------------|--------------|----------------|------|--------------|------|---------------|------|---------------|------|-------------------|------|
|                                        |              | N              | %    | N            | %    | N             | %    | N             | %    | N                 | %    |
| <b>Age at entry (y)</b>                |              |                |      |              |      |               |      |               |      |                   |      |
| <55                                    | 311,425      | 159            | 11.0 | 34           | 18.3 | 765           | 10.1 | 116           | 9.7  | 22,448            | 11.8 |
| 55-59                                  | 605,257      | 343            | 23.6 | 53           | 28.5 | 1,759         | 23.4 | 240           | 20.2 | 44,417            | 23.3 |
| 60-64                                  | 745,909      | 451            | 31.0 | 53           | 28.5 | 2,263         | 30.1 | 360           | 30.2 | 55,875            | 29.4 |
| 65-69                                  | 782,827      | 459            | 31.6 | 40           | 21.5 | 2,472         | 32.9 | 436           | 36.6 | 60,862            | 32.0 |
| ≥70                                    | 83,508       | 41             | 2.8  | 6            | 3.2  | 266           | 3.5  | 39            | 3.3  | 6,723             | 3.5  |
| <b>Race</b>                            |              |                |      |              |      |               |      |               |      |                   |      |
| White                                  | 2,258,130    | 1,302          | 89.6 | 169          | 90.9 | 6,846         | 91.0 | 1,098         | 92.2 | 170,165           | 89.4 |
| Non-white                              | 270,797      | 151            | 10.4 | 17           | 9.1  | 679           | 9.0  | 93            | 7.8  | 20,160            | 10.6 |
| <b>Age at menarche (y)</b>             |              |                |      |              |      |               |      |               |      |                   |      |
| ≤12                                    | 1,228,081    | 701            | 48.3 | 97           | 52.2 | 3,728         | 49.5 | 562           | 47.2 | 92,703            | 48.7 |
| 13-14                                  | 1,053,163    | 637            | 43.8 | 71           | 38.2 | 3,132         | 41.6 | 518           | 43.5 | 79,067            | 51.5 |
| ≥15                                    | 238,684      | 112            | 7.7  | 17           | 9.1  | 646           | 8.6  | 106           | 8.9  | 17,859            | 9.4  |
| Unknown                                | 8,998        | 3              | 0.2  | 1            | 0.5  | 19            | 0.3  | 5             | 0.4  | 696               | 0.4  |
| <b>Age at first birth (y)</b>          |              |                |      |              |      |               |      |               |      |                   |      |
| <20                                    | 445,808      | 202            | 13.9 | 25           | 13.4 | 1,159         | 15.4 | 136           | 11.4 | 33,874            | 17.8 |
| 20-24                                  | 1,111,354    | 590            | 40.6 | 71           | 38.2 | 3,173         | 42.2 | 471           | 39.5 | 83,327            | 43.8 |
| 25-29                                  | 448,866      | 281            | 19.3 | 42           | 22.6 | 1,376         | 18.3 | 270           | 22.7 | 33,556            | 17.6 |
| ≥30/ Nulliparous                       | 496,223      | 361            | 24.9 | 47           | 25.3 | 1,729         | 23.0 | 300           | 25.2 | 37,518            | 19.7 |
| Unknown                                | 26,675       | 19             | 1.3  | 1            | 0.5  | 88            | 1.1  | 14            | 1.2  | 2,050             | 1.1  |
| <b>Age at menopause (y)</b>            |              |                |      |              |      |               |      |               |      |                   |      |
| 50-54                                  | 712,338      | 380            | 26.2 | 73           | 39.3 | 2,326         | 30.9 | 391           | 32.8 | 53,188            | 27.9 |
| 45-49                                  | 172,750      | 116            | 8.0  | 11           | 5.9  | 433           | 5.8  | 72            | 6.1  | 13,350            | 7.0  |
| <45                                    | 408,166      | 214            | 14.7 | 25           | 13.4 | 1,232         | 16.4 | 184           | 15.4 | 30,905            | 16.2 |
| ≥55                                    | 157,284      | 106            | 7.3  | 11           | 5.9  | 638           | 8.5  | 106           | 8.9  | 11,896            | 6.3  |
| Surgical                               | 1,013,203    | 567            | 39.0 | 56           | 30.1 | 2,682         | 35.6 | 411           | 34.5 | 76,066            | 40.0 |
| Unknown                                | 65,185       | 70             | 4.8  | 10           | 5.4  | 214           | 2.8  | 27            | 2.3  | 4,920             | 2.6  |
| <b>Menopausal hormone therapy</b>      |              |                |      |              |      |               |      |               |      |                   |      |
| Never                                  | 1,149,010    | 530            | 36.5 | 47           | 25.3 | 3,145         | 41.8 | 503           | 42.2 | 87,271            | 45.8 |
| Former                                 | 234,419      | 121            | 8.3  | 14           | 7.5  | 646           | 8.6  | 83            | 7.0  | 17,690            | 9.3  |
| Current (<5 years)                     | 314,462      | 197            | 13.6 | 38           | 20.4 | 964           | 12.8 | 167           | 14.0 | 23,175            | 12.2 |
| Current (5-9 years)                    | 309,698      | 246            | 16.9 | 46           | 24.7 | 1,102         | 14.6 | 171           | 14.4 | 22,933            | 12.1 |
| Current (≥10 years)                    | 513,974      | 355            | 24.4 | 41           | 22.1 | 1,657         | 22.0 | 266           | 22.3 | 38,712            | 20.3 |
| Unknown                                | 7,363        | 4              | 0.3  | 0            | 0.0  | 11            | 0.2  | 1             | 0.1  | 544               | 0.3  |
| <b>Family history of breast cancer</b> |              |                |      |              |      |               |      |               |      |                   |      |
| No                                     | 2,106,940    | 1,117          | 76.9 | 152          | 81.7 | 5,894         | 78.3 | 962           | 80.8 | 158,185           | 83.1 |
| Yes                                    | 309,208      | 270            | 18.6 | 26           | 14.0 | 1,292         | 17.2 | 186           | 15.6 | 23,542            | 12.4 |
| Unknown                                | 112,778      | 66             | 4.5  | 8            | 4.3  | 339           | 4.5  | 43            | 3.6  | 8,598             | 4.5  |
| <b>Breast biopsy</b>                   |              |                |      |              |      |               |      |               |      |                   |      |

|                               |           |     |      |     |      |       |      |     |      |         |      |
|-------------------------------|-----------|-----|------|-----|------|-------|------|-----|------|---------|------|
| <b>No</b>                     | 1,914,537 | 958 | 65.9 | 109 | 58.6 | 5,199 | 69.1 | 786 | 66.0 | 143,510 | 75.4 |
| <b>Yes</b>                    | 600,015   | 485 | 33.4 | 77  | 41.4 | 2,289 | 30.4 | 399 | 33.5 | 45,706  | 24.0 |
| <b>Unknown</b>                | 14,374    | 10  | 0.7  | 0   | 0.0  | 37    | 0.5  | 6   | 0.5  | 1,109   | 0.6  |
| <b>Alcohol (grams /day)</b>   |           |     |      |     |      |       |      |     |      |         |      |
| <b>None</b>                   | 742,312   | 398 | 27.4 | 41  | 22.0 | 2,059 | 27.4 | 304 | 25.5 | 56,936  | 29.9 |
| <b>≤10</b>                    | 1,379,452 | 811 | 55.8 | 110 | 59.1 | 4,063 | 54.0 | 651 | 54.7 | 102,539 | 53.9 |
| <b>&gt;10.01-20</b>           | 229,796   | 135 | 9.3  | 23  | 12.4 | 748   | 9.9  | 119 | 10.0 | 17,181  | 9.0  |
| <b>&gt;20.01</b>              | 177,368   | 109 | 7.5  | 12  | 6.5  | 655   | 8.7  | 117 | 9.8  | 13,669  | 7.2  |
| <b>Smoking</b>                |           |     |      |     |      |       |      |     |      |         |      |
| <b>Never</b>                  | 1,148,983 | 652 | 44.9 | 86  | 46.2 | 3,222 | 42.8 | 517 | 43.4 | 83,905  | 44.1 |
| <b>Former (&gt;1 year)</b>    | 919,494   | 551 | 37.9 | 67  | 36.0 | 2,946 | 39.2 | 451 | 37.9 | 69,588  | 36.6 |
| <b>Current (&lt;1 year)</b>   | 385,261   | 207 | 14.2 | 23  | 12.4 | 1,143 | 15.2 | 199 | 16.7 | 31,082  | 16.3 |
| <b>Unknown</b>                | 75,187    | 43  | 3.0  | 10  | 5.4  | 214   | 2.8  | 24  | 2.0  | 5,750   | 3.0  |
| <b>BMI (kg/m<sup>2</sup>)</b> |           |     |      |     |      |       |      |     |      |         |      |
| <b>&lt;18.5</b>               | 31,246    | 14  | 1.0  | 0   | 0.0  | 71    | 0.9  | 9   | 0.8  | 2,472   | 1.3  |
| <b>18.5-24.9</b>              | 1,051,685 | 602 | 41.4 | 86  | 46.3 | 2,971 | 39.5 | 501 | 42.1 | 78,439  | 41.2 |
| <b>25-29.9</b>                | 804,639   | 467 | 32.2 | 48  | 25.8 | 2,409 | 32.0 | 381 | 32.0 | 60,170  | 31.6 |
| <b>30-34.9</b>                | 357,303   | 201 | 13.8 | 32  | 17.2 | 1,140 | 15.2 | 163 | 13.7 | 27,071  | 14.2 |
| <b>≥35.0</b>                  | 191,455   | 118 | 8.1  | 14  | 7.5  | 686   | 9.1  | 91  | 7.6  | 14,886  | 7.8  |
| <b>Unknown</b>                | 92,597    | 51  | 3.5  | 6   | 3.2  | 248   | 3.3  | 46  | 3.8  | 7,287   | 3.9  |
| <b>Education</b>              |           |     |      |     |      |       |      |     |      |         |      |
| <b>&lt;College</b>            | 808,760   | 439 | 30.2 | 47  | 25.3 | 2,207 | 29.3 | 332 | 27.9 | 61,067  | 32.1 |
| <b>≥College</b>               | 1,638,637 | 976 | 67.2 | 132 | 71.0 | 5,097 | 67.7 | 819 | 68.7 | 122,997 | 62.6 |
| <b>Unknown</b>                | 81,529    | 38  | 2.6  | 7   | 3.7  | 221   | 3.0  | 40  | 3.4  | 6,261   | 3.3  |
| <b>Physical activity</b>      |           |     |      |     |      |       |      |     |      |         |      |
| <b>Never/ rarely</b>          | 547,206   | 313 | 21.5 | 38  | 20.5 | 1,675 | 22.3 | 247 | 20.8 | 42,908  | 22.5 |
| <b>1-3 / months</b>           | 360,316   | 194 | 13.4 | 33  | 17.7 | 1,109 | 14.7 | 187 | 15.7 | 27,024  | 14.2 |
| <b>1-2 / weeks</b>            | 532,741   | 320 | 22.0 | 33  | 17.7 | 1,613 | 21.4 | 260 | 21.8 | 39,728  | 20.9 |
| <b>3-4 / weeks</b>            | 640,822   | 383 | 26.4 | 47  | 25.3 | 1,875 | 25.0 | 286 | 24.0 | 47,463  | 24.9 |
| <b>≥5 / weeks</b>             | 416,826   | 228 | 15.7 | 34  | 18.3 | 1,160 | 15.4 | 194 | 16.3 | 30,796  | 16.2 |
| <b>Unknown</b>                | 31,016    | 15  | 1.0  | 1   | 0.5  | 93    | 1.2  | 17  | 1.4  | 2,406   | 1.3  |

Abbreviations: BMI, body mass index; CI, confidence interval; DCIS, ductal carcinoma in situ; HR, hazard ratio; IDC, invasive ductal carcinoma; ILC, invasive lobular carcinoma; LCIS, lobular carcinoma in situ; MHT, menopausal hormone therapy; Y, years
